# Supplementary material for: Enhanced Photoluminescence and Random Lasing Emission in TiO2-Decorated FAPbBr3 Thin Films
Source: MDPI journal article supplement (doi:10.3390/nano13111761), 2023-05-30
Supplement: s1 [file s1]

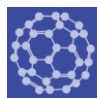

Supplementary Information

# Enhanced Photoluminescence and Random Lasing Emission in TiO<sub>2</sub>-Decorated FAPbBr<sub>3</sub> Thin Films

Xiaohong Liu <sup>1,2,3</sup>, Caixia Xu <sup>4,\*</sup> and Hongquan Zhao <sup>1,2,3,\*</sup><sup>1</sup> Chongqing University, Shapingba, Chongqing 400044, China<sup>2</sup> Chongqing Institute of Green and Intelligent Technology, Chinese Academy of Sciences, Chongqing 400714, China<sup>3</sup> Chongqing School, University of Chinese Academy of Sciences, Chongqing 400714, China<sup>4</sup> School of Primary Education, Chongqing Normal University, Chongqing, 400700 China

\* Correspondence: noendness@126.com (C.X.); hqzhao@cigit.ac.cn (H.Z.).

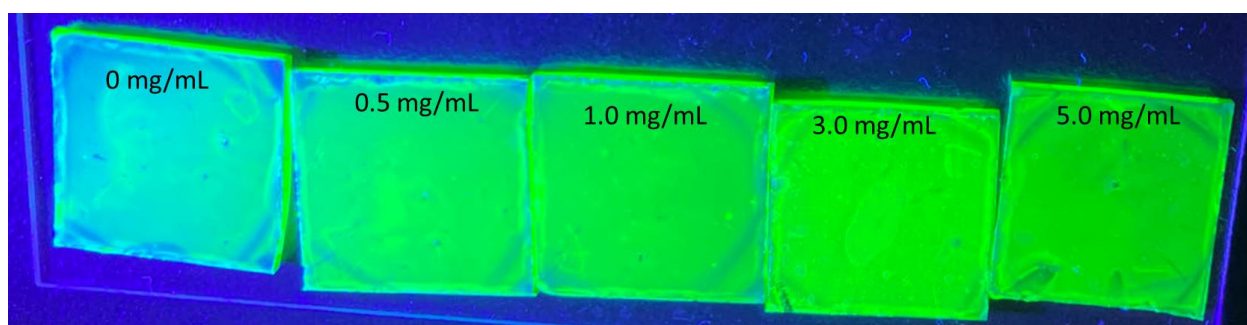

**Figure S1.** The photographs of the FAPbBr<sub>3</sub> thin films with and without TiO<sub>2</sub> nanoparticles decoration.

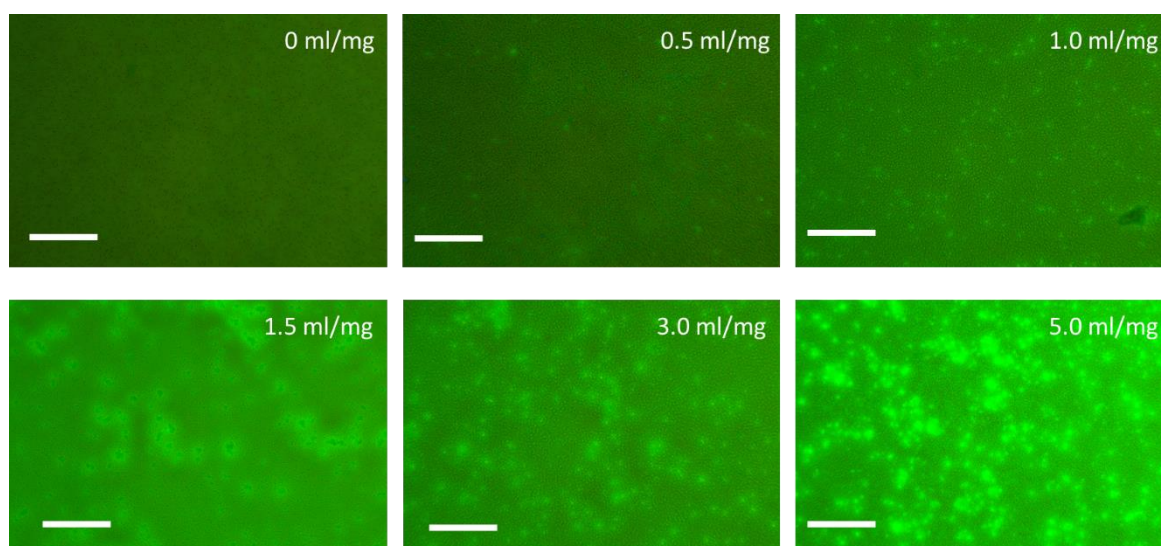

**Figure S2.** The distribution of photoluminescence emission in the FAPbBr<sub>3</sub> thin films with and without TiO<sub>2</sub> nanoparticles decoration measured by using the home-built fluorescence microscope (the scale bar is 100 μm).
